# Supplementary material for: The Unified Language Testing Plan: Speaking Proficiency Test. Russian Pilot Validation Studies. Report Number 2.
Source: Hindawi journal article supplement (doi:10.1155/2014/870209), 1996-05-01
Supplement: f1 [file 870209.f1.pdf]

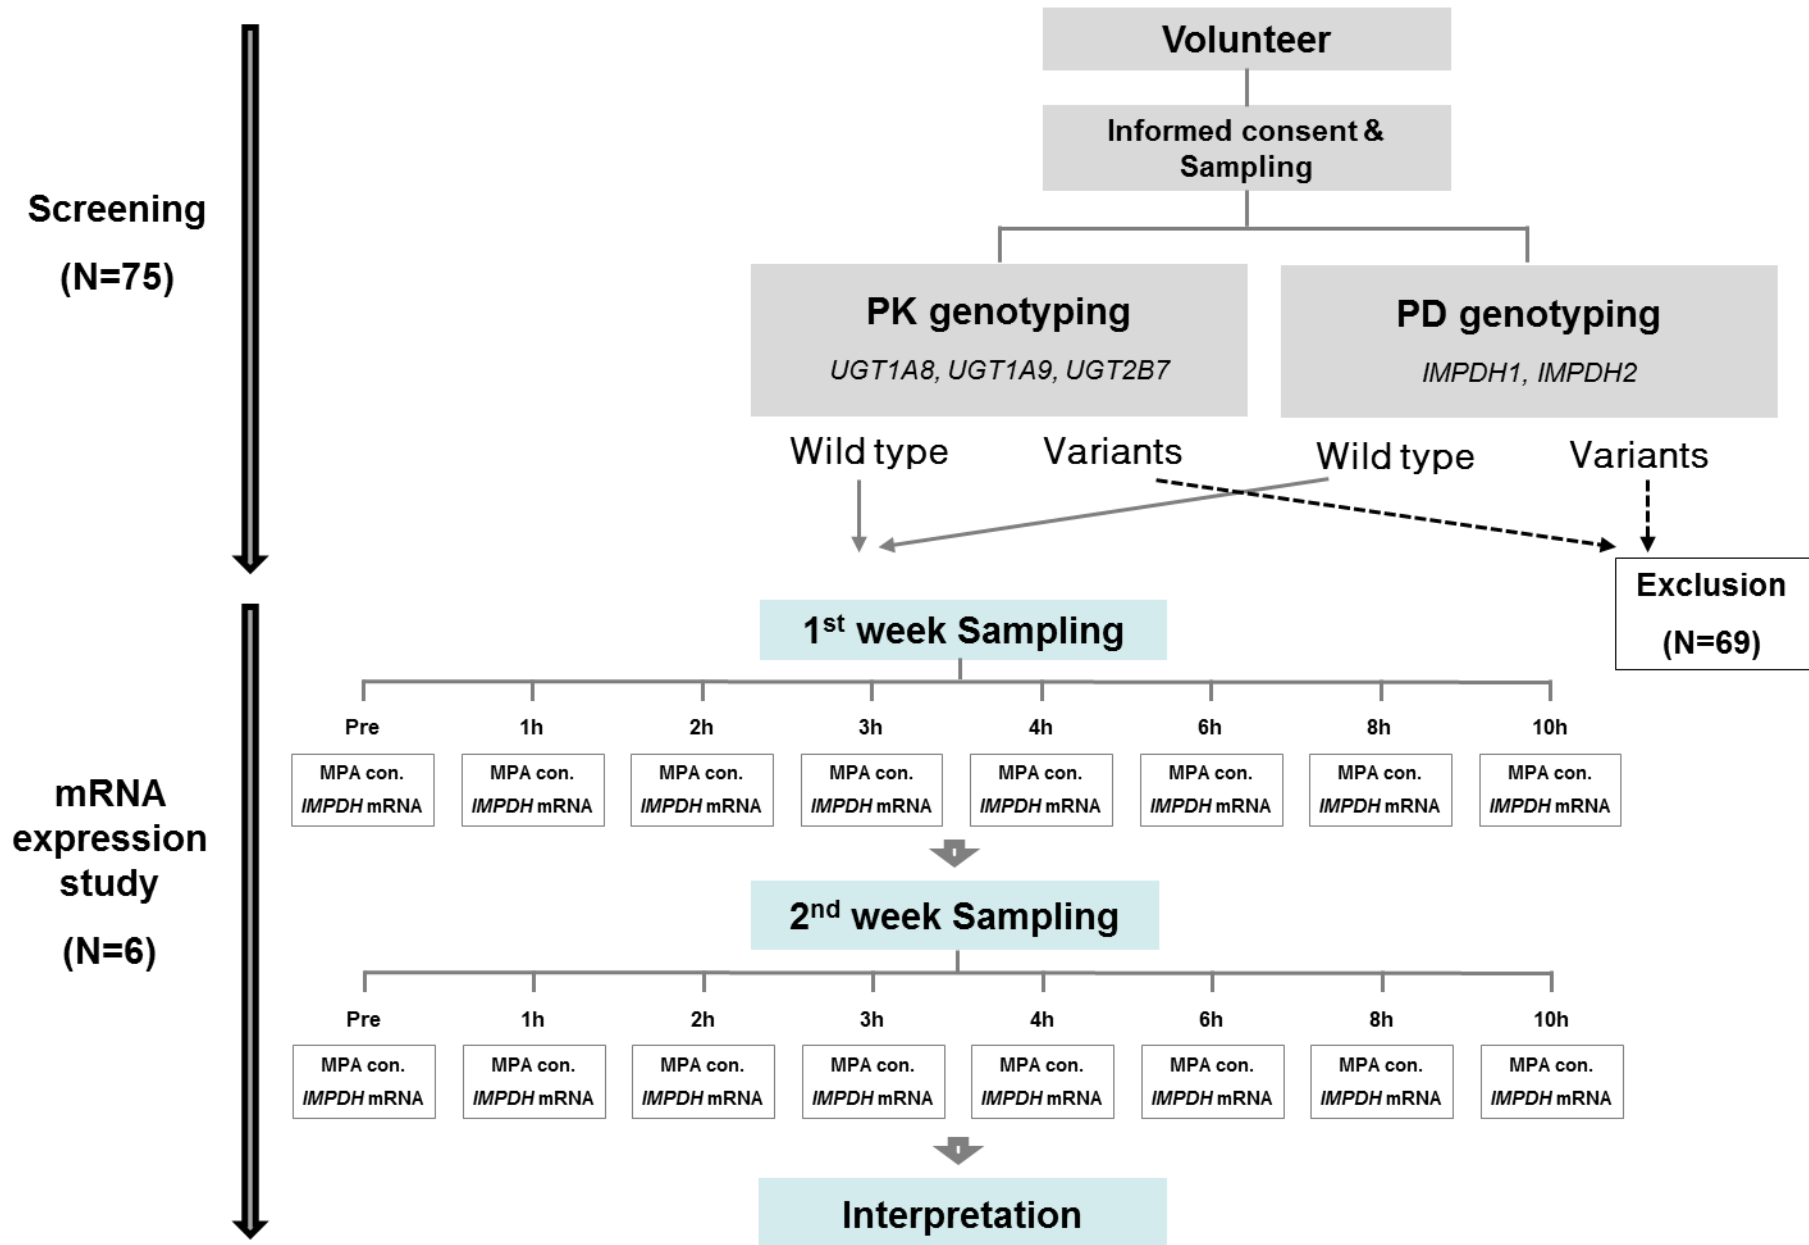

1  
2 **Supplementary Figure 1. Study design.**

1 **Supplementary Table 1.** SNPs associated with MPA level and sequence information of primers and reporters for genotyping.

| Gene          | SNPs       | Sequence Change          | Forward Primer   | Reverse Primer    | Reporter 1      | Reporter 2     |
|---------------|------------|--------------------------|------------------|-------------------|-----------------|----------------|
| <i>UGT1A8</i> | rs1042597  | NM_019076.4: c.518C>G    | CCCTCCCCTCTGTGGT | GGCACTGTGCACCTTCT | TAGTGGCAAGCTATT | TAGTGGCAACCTA  |
|               |            | (*2)                     | CTT              | TCA               | C               | TTC            |
| <i>UGT1A9</i> | rs17868320 | NM_021027.2: c.-2152C>T  | TGATCTCAGCTCAATG | TGCCTGTAATCCCAGCT | AGAATCACTTGAAC  | AGAATCACTTAAA  |
|               |            |                          | CAACCT           | ACTCT             | CCGG            | CCCGG          |
|               | rs72551330 | NM_021027.2: c.98T>C     | AGGCAGGGAAGCTAC  | CCGACCTCATGGTGAAC | CCCATCCGTGGGCAC | TCCCATCCATGGG  |
|               |            |                          | TGGTA            | CA                |                 | CAC            |
|               | rs6714486  | NM_021027.2: c.-275T>A   | CTTCAAGGTCCAAAA  | GCCCTGTGCTGCAATGT | ATAATTCTGCTACTA | ATTCTGCTTCTAAA |
|               |            |                          | GCATTGGTTA       | T                 | AACTT           | CTT            |
| <i>UGT2B7</i> | rs7439366  | NM_001074.2: c.802T>C    | CTGACGTATGGCTTAT | TGGAGTCCTCCAACAA  | AGTGGATGAGGAAA  | AGAGTGGATAAGG  |
|               |            | (*2)                     | TCGAAACTC        | AATCAACAT         | CT              | AAACT          |
| <i>IMPDH1</i> | rs2278293  | NM_000883.3:c.579+119G>  | GCCCTGCACTGCTAC  | AGGAGCCAGTGGGAAA  | TCCTCTCAGTAGAGC | CCTCTCAGTGGAG  |
|               |            | A                        | ACT              | ATGAG             | CT              | CCT            |
|               | rs2278294  | NM_000883.3:c.580-106G>A | ATTTTCCCCTGCTC   | CACAGGGAACAGAGGA  | AAGCCAGGATCCTC  | AGCCAGGACCCTC  |
|               |            |                          | CTCATC           | TGCA              | AG              | AG             |
| <i>IMPDH2</i> | rs12143458 | NM_000884.2:c.787C>T     | GCCCTGCACTGCTAC  | AGGAGCCAGTGGGAAA  | TCCTCTCAGTAGAGC | CCTCTCAGTGGAG  |
|               | 6          |                          | ACT              | ATGAG             | CT              | CCT            |
|               | rs11706052 | NM_000884.2:c.819+10T>C  | GCAGCTGCCCTAATTG | GGTGTGGATGTAGTGGT | ACCTGTGTAGCAGCT | CTGTGTGGCAGCT  |
|               |            |                          | C                | TTTGGT            | C               | C              |
|               | rs72639214 | NM_000884.2:c.98+93G>C   | TTCCGAGAGCCGCCT  | TGGCCAATCCCGAAAC  | CCACGCGCACGCC   | CCCACGCCACGC   |
|               |            | (IVS1+93)                | TG               | CT                |                 | C              |

1

2 **Supplementary Table 2.** Primer information for real-time PCR analysis of mRNA expression.

| <b>Genes</b>  | <b>F/R</b> | <b>Sequences</b>     | <b>Tm (°C)</b> | <b>Exon</b> | <b>Product Size (bp)</b> |
|---------------|------------|----------------------|----------------|-------------|--------------------------|
| <i>IMPDH1</i> | F          | TTCGTGCCCTACCTCATAGC | 60.2           | E15         | 80                       |
|               | R          | ATGGACCGAAGGACAGACAG | 60.1           | E15/16      |                          |
| <i>IMPDH2</i> | F          | CAGGCATCACACTGAAGGAG | 59.4           | E6          | 60                       |
|               | R          | GCAACTTTCCTTCTTGCTG  | 60             | E6/e7       |                          |
| <i>ACTB</i>   | F          | CTCTTCCAGCCTTCCTCCT  | 60             | E4          | 116                      |
|               | R          | AGCACTGTGTTGGCGTACAG | 60             | E5          |                          |

3
